# Supplementary material
Source: publisher figshare collection journal article supplement (https://karger.figshare.com/ndownloader/files/27958566)
Supplement: Supplementary file 1 [file 27958566]

**Supplementary Material - Additional File 1**

MEDLINE search strategy.

|  | Search terms |
| --- | --- |
| 1 | (instrumentation or methods).sh. |
| 2 | (Validation Studies or Comparative Study).pt. |
| 3 | exp Psychometrics/ |
| 4 | psychometr*.ti,ab. |
| 5 | (clinimetr* or clinometr*).tw. |
| 6 | exp "Outcome Assessment (Health Care)"/ |
| 7 | outcome assessment.ti,ab. |
| 8 | outcome measure*.tw. |
| 9 | exp Observer Variation/ |
| 10 | observer variation.ti,ab. |
| 11 | exp Health Status Indicators/ |
| 12 | exp "Reproducibility of Results"/ |
| 13 | reproducib*.ti,ab. |
| 14 | exp Discriminant Analysis/ |
| 15 | (reliab* or unreliab* or valid* or coefficient or homogeneity or homogeneous or "internal consistency").ti,ab. |
| 16 | (cronbach* and (alpha or alphas)).ti,ab. |
| 17 | (item and (correlation* or selection* or reduction*)).ti,ab. |
| 18 | (agreement or precision or imprecision or "precise values" or test-retest).ti,ab. |
| 19 | (test and retest).ti,ab. |
| 20 | (reliab* and (test or retest)).ti,ab. |
| 21 | (stability or interrater or inter-rater or intrarater or intra-rater or intertester or inter-tester or intratester or intra-tester or interobserver or inter-observer or intraobserver or intra-observer or intertechnician or inter-technician or intratechnician or intra-technician or interexaminer or inter-examiner or intraexaminer or intra-examiner or interassay or inter-assay or intraassay or intra-assay or interindividual or inter-individual or intraindividual or intra-individual or interparticipant or inter-participant or intraparticipant or intra-participant or kappa or kappa's or kappas or repeatab*).ti,ab. |
| 22 | ((replicab* or repeated) and (measure or measures or findings or result or results or test or tests)).ti,ab. |
| 23 | (generaliza* or generalisa* or concordance).ti,ab. |
| 24 | (intraclass and correlation*).ti,ab. |
| 25 | (discriminative or "known group" or factor analysis or factor analyses or dimension* or subscale*).ti,ab. |
| 26 | (multitrait and scaling and (analysis or analyses)).ti,ab. |
| 27 | (item discriminant or interscale correlation* or error or errors or "individual variability").ti,ab. |
| 28 | (variability and (analysis or values)).ti,ab. |
| 29 | (uncertainty and (measurement or measuring)).ti,ab. |
| 30 | ("standard error of measurement" or sensitiv* or responsive*).ti,ab. |
| 31 | ((minimal or minimally or clinical or clinically) and (important or significant or detectable) and (change or difference)).ti,ab. |
| 32 | (small* and (real or detectable) and (change or difference)).ti,ab. |
| 33 | (meaningful change or "ceiling effect" or "floor effect" or "Item response model" or IRT or Rasch or "Differential item functioning" or DIF or "computer adaptive testing" or "item bank" or "cross-cultural equivalence").ti,ab. |
| 34 | 1 or 2 or 3 or 4 or 5 or 6 or 7 or 8 or 9 or 10 or 11 or 12 or 13 or 14 or 15 or 16 or 17 or 18 or 19 or 20 or 21 or 22 or 23 or 24 or 25 or 26 or 27 or 28 or 29 or 30 or 31 or 32 or 33 |
| 35 | exp APATHY/ |
| 36 | apath*.mp |
| 37 | amotivat*.ti,ab. |
| 38 | diminished motivation.ti,ab. |
| 39 | diminished interest.ti,ab. |
| 40 | lack of interest.ti,ab. |
| 41 | diminished initiat*.ti,ab. |
| 42 | lack of initiat*.ti,ab. |
| 43 | lack of motivation.ti,ab. |
| 44 | emotional* blunt*.ti,ab. |
| 45 | abulia.ti,ab. |
| 46 | anhedonia.ti,ab. |
| 47 | exp Anhedonia / |
| 48 | frontal symptom*.ti,ab. |
| 49 | emotional responsiv*.ti,ab. |
| 50 | asocial*.ti,ab. |
| 51 | avolition*.ti,ab. |
| 52 | lassitude.ti,ab. |
| 53 | 35 or 36 or 37 or 38 or 39 or 40 or 41 or 42 or 43 or 44 or 45 or 46 or 47 or 48 or 49 or 50 or 51 or 52 |
| 54 | 34 and 53 |
| 55 | limit 54 to "all adult (19 plus years)" |
